# Supplementary material
Source: PubMed Central journal article supplement (PMC4696427)
Supplement: Supp_Table1.pdf [file Supp_Table1.pdf]

SUPPLEMENTARY TABLE 1. MAGNETIC RESONANCE IMAGING PARAMETERS

| Group   | Location         | MR Model                    | Magnetic Field Strength (Tesla) | # Head Coil Channels | Series      | Slice Thickness (mm) | Repetition Time (ms) | Echo Time (ms) | Inversion Time (ms) | Flip Angle |
|---------|------------------|-----------------------------|---------------------------------|----------------------|-------------|----------------------|----------------------|----------------|---------------------|------------|
| Control | UCSF Clinical    | GE Signa HDxt               | 1.5                             | 8                    | 3D T2 FLAIR | 1.6                  | 5916.67              | 143.236        | 1804                | 90         |
| Control | UCSF Clinical    | GE Discovery MR750          | 3                               | 8                    | 3D T2 FLAIR | 1.1                  | 6016.67              | 122.029        | 1601.11             | 90         |
| Control | UCSF Clinical    | GE Discovery MR750          | 3                               | 8                    | 3D T1       | 1.2                  | 10.172               | 4.172          | 450                 | 12         |
| Control | UCSF Clinical    | GE Discovery MR750          | 3                               | 8                    | 3D T2 FLAIR | 1.1                  | 5716.67              | 123.436        | 1801                | 90         |
| Control | UCSF Clinical    | GE Discovery MR750          | 3                               | 8                    | 3D T1       | 1.2                  | 7.128                | 2.696          | 450                 | 12         |
| Control | UCSF Clinical    | GE Discovery MR750          | 3                               | 8                    | 3D T1       | 1                    | 7.524                | 3.1            | 900                 | 8          |
| Control | UCSF Clinical    | GE Discovery MR750          | 3                               | 8                    | 3D T1       | 1                    | 8.16                 | 3.172          | 400                 | 11         |
| Control | UCSF Clinical    | GE Discovery MR750          | 3                               | 8                    | 3D T2 FLAIR | 1.1                  | 6016.67              | 133.592        | 1573.21             | 90         |
| Control | UCSF Clinical    | GE Signa HDxt               | 3                               | 8                    | 3D T1       | 1                    | 7.62                 | 2.852          | 750                 | 12         |
| Control | UCSF Clinical    | GE Signa HDxt               | 3                               | 8                    | 3D T1       | 1                    | 7.416                | 2.304          | 400                 | 15         |
| Control | UCSF Clinical    | GE Signa HDxt               | 3                               | 8                    | 3D T2 FLAIR | 1.1                  | 5800                 | 133.822        | 1796                | 90         |
| Control | UCSF Clinical    | GE Signa HDxt               | 3                               | 8                    | 3D T1       | 1.2                  | 7.616                | 2.848          | 750                 | 12         |
| Control | UCSF Clinical    | Siemens Verio               | 3                               | 12                   | 3D T1       | 1.2                  | 1900                 | 2.19           | 900                 | 9          |
| Control | UCSF Research    | Siemens TrioTim             | 3                               | 12                   | 3D T1       | 1                    | 2300                 | 2.98           | 900                 | 9          |
| Control | UCSF Research    | Siemens TrioTim             | 3                               | 12                   | 3D T1       | 1                    | 2300                 | 2.98           | 900                 | 9          |
| Control | UCSF Research    | Siemens TrioTim             | 3                               | 12                   | 3D T1       | 1                    | 2300                 | 2.98           | 900                 | 9          |
| Control | UCSF Research    | Siemens TrioTim             | 3                               | 12                   | 3D T1       | 1                    | 2300                 | 2.98           | 900                 | 9          |
| Player  | Outside Hospital | Phillips Healthcare Ingenia | 3                               | NA                   | 3D T1       | 1                    | 8.22                 | 3.792          | NA                  | 8          |
| Player  | Outside Hospital | Siemens TrioTim             | 3                               | NA                   | 3D T1       | 0.8                  | 1800                 | 2.29           | 900                 | 9          |
| Player  | UCSF Clinical    | GE Signa HDxt               | 1.5                             | 8                    | 3D T1       | 1.6                  | 10.476               | 4.332          | 450                 | 25         |
| Player  | UCSF Clinical    | GE Signa HDxt               | 1.5                             | 8                    | 3D T1       | 1.5                  | 8.904                | 4.012          | 450                 | 20         |
| Player  | UCSF Clinical    | GE Signa HDxt               | 1.5                             | 8                    | 3D T2 FLAIR | 1.8                  | 5800                 | 129.252        | 1812                | 90         |
| Player  | UCSF Clinical    | GE Discovery MR750          | 3                               | 8                    | 3D T1       | 1.2                  | 7.168                | 2.696          | 450                 | 12         |
| Player  | UCSF Clinical    | GE Discovery MR750          | 3                               | 8                    | 3D T1       | 1.2                  | 7.228                | 2.716          | 450                 | 12         |
| Player  | UCSF Clinical    | GE Discovery MR750          | 3                               | 8                    | 3D T1       | 1.2                  | 7.18                 | 2.696          | 450                 | 12         |
| Player  | UCSF Clinical    | GE Discovery MR750          | 3                               | 8                    | 3D T2 FLAIR | 1.1                  | 5850                 | 122.796        | 1532.74             | 90         |
| Player  | UCSF Clinical    | GE Discovery MR750          | 3                               | 8                    | 3D T1       | 1                    | 7.244                | 2.712          | 450                 | 12         |
| Player  | UCSF Clinical    | Siemens Verio               | 3                               | 12                   | 3D T1       | 1.2                  | 20                   | 4.92           | NA                  | 25         |
| Player  | UCSF Clinical    | Siemens Verio               | 3                               | 12                   | 3D T1       | 1.2                  | 1900                 | 2.19           | 900                 | 9          |
| Player  | UCSF Research    | Siemens TrioTim             | 3                               | 12                   | 3D T1       | 1                    | 2300                 | 2.98           | 900                 | 9          |
| Player  | UCSF Research    | Siemens TrioTim             | 3                               | 12                   | 3D T1       | 1                    | 2300                 | 2.98           | 900                 | 9          |
| Player  | UCSF Research    | Siemens TrioTim             | 3                               | 12                   | 3D T1       | 1                    | 2300                 | 2.98           | 900                 | 9          |
| Player  | UCSF Research    | Siemens TrioTim             | 3                               | 12                   | 3D T1       | 1                    | 2300                 | 2.98           | 900                 | 9          |
| Player  | UCSF Research    | Siemens TrioTim             | 3                               | 12                   | 3D T1       | 1                    | 2300                 | 2.98           | 900                 | 9          |

NA, not available.
